# Supplementary material
Source: PubMed Central journal article supplement (PMC8134858)
Supplement: mmc1.pdf [file mmc1.pdf]

SUPPLEMENTAL FILE

**Primary Spine Care Patient Survey**

This brief survey will ask about your preferences, beliefs, and experiences with low back pain treatment. The survey should take approximately 15 minutes to complete. Please answer all questions as best as you can. Thank you for your participation!

**Demographic Questions:**

Age: \_\_\_\_\_

Sex:

- Female
- Male
- Decline to answer

What is your Ethnicity? (Please select the most appropriate answer).

- Hispanic, Latino, or Spanish origin
- NOT Hispanic, Latino, or Spanish
- Unknown
- Decline to answer

How do you describe yourself? (Please select the most appropriate answer).

- American Indian or Alaska Native
- Asian
- White or Caucasian
- Black or African American
- Native Hawaiian or other Pacific Islander
- More than one race
- Hispanic
- Unknown
- Decline to answer
- Other

What is the highest level of education you completed? (Please check the most appropriate answer).

- Did not complete high school
- High School/GED

- Some college
- Bachelor's Degree
- Master's Degree
- Advanced Graduate Work or Ph.D.

In the last 12 months, approximately how many visits have you made to this office for low back pain? (1, 2, 3,...): \_\_\_\_\_

**Preferences & Experience with Chiropractic Care**

The next set of questions ask about your preferences and experiences with seeing a chiropractic physician for low back pain. Please select the best response.

1. Which of the following best describes your personal experience with a chiropractor for low back pain?

- I have been to a chiropractor in the last 3 months for low back pain
- I have been to a chiropractor in the last 4 to 6 months for low back pain
- I have not been to a chiropractor in the last year for low back pain
- I have not been to a chiropractor in the last 3 years for low back pain
- I have never been to a chiropractor as a patient for low back pain

2. If you have been to a chiropractor as a patient for low back pain in the last 6 months, how many visits have you had?

- 1 to 6 visits in the last 6 months
- 7 to 12 visits in the last 6 months
- 13 to 18 visits in the last 6 months
- more than 18 visits in the last 6 months
- Not Applicable

3. In general, I have been satisfied with the chiropractic care I have received.

|                       |                       |                       |                       |                       |
|-----------------------|-----------------------|-----------------------|-----------------------|-----------------------|
| Strongly disagree     | Disagree              | Undecided             | Agree                 | Strongly agree        |
| <input type="radio"/> |

4. A chiropractor is the first healthcare provider I want to see about my general health.

|                       |                       |                       |                       |                       |
|-----------------------|-----------------------|-----------------------|-----------------------|-----------------------|
| Strongly disagree     | Disagree              | Undecided             | Agree                 | Strongly agree        |
| <input type="radio"/> |

**Preferences & Experience with Conventional Care**

The next set of questions ask about your preferences and experiences with seeing a medical doctor (or primary care physician) for low back pain. Please select the best response.

5. Which of the following best describes your personal experience with a primary care physician for low back pain?

- I have seen a primary care physician in the last 3 months for low back pain
- I have seen a primary care physician in the last 4 to 6 months for low back pain
- I have not been to a primary care physician for low back pain in the last year
- I have not seen a primary care physician for low back pain in the last 3 years
- I have never been to a primary care physician for low back pain

6. If you have been to a primary care physician as a patient for low back pain in the last 6 months, how many visits have you had?

- 1 to 6 visits in the last 6 months
- 7 to 12 visits in the last 6 months
- 12 to 18 visits in the last 6 months
- 18 visits or more in the last 6 months
- Not Applicable

7. In general, I have been satisfied with the medical care I have received for my low back pain.

|                       |                       |                       |                       |                       |
|-----------------------|-----------------------|-----------------------|-----------------------|-----------------------|
| Strongly disagree     | Disagree              | Undecided             | Agree                 | Strongly agree        |
| <input type="radio"/> |

8. A primary care physician is the first healthcare provider I want to see about my general health.

|                       |                       |                       |                       |                       |
|-----------------------|-----------------------|-----------------------|-----------------------|-----------------------|
| Strongly disagree     | Disagree              | Undecided             | Agree                 | Strongly agree        |
| <input type="radio"/> |

9. If you have seen a primary care physician as a patient in the last 6 months, were you prescribed pain medication for your low back pain?

- Yes
- No
- Do not know/Not Sure
- Not Applicable

10. If yes, did you fill your prescriptions?

- Yes
- No
- Do not know/Not Sure

11. In general, I have been satisfied with the prescription drug therapy I have received for low back pain.

|                       |                       |                       |                       |                       |
|-----------------------|-----------------------|-----------------------|-----------------------|-----------------------|
| Strongly disagree     | Disagree              | Undecided             | Agree                 | Strongly agree        |
| <input type="radio"/> |

## Use of Prescription Medications

The next set of questions ask about your use of prescription medications for low back pain. Please select the best answer.

12. Have you used prescription medications for low back pain?

- Yes, regularly to manage pain
- Yes, on occasion or as needed for pain management
- No, I generally do not take medications for pain management
- Do not know/Not Sure
- Not Applicable

13. If yes, please indicate medication(s) used (check all that apply).

- Acetaminophen/Codeine
- Butalbital
- Codeine Sulfate
- Cyclobenzaprine
- Fentanyl
- Dihydrocodeine
- Hydrocodone/Acetaminophen
- Hydrocodone/Ibuprofen
- Hydromorphone
- Methadone
- Morphine (Morphine Sulfate)
- Oxycodone (Oxycodone/Aspirin, Oxycodone/Acetaminophen, Oxycodone/Ibuprofen)
- Opana (Oxymorphone Hydrochloride)
- Tramadol (Tramadol Hydrochloride/Acetaminophen)
- Hydrocodone or Tylenol with codeine
- Ibuprofen (prescription)
- Vicodin or Vicodin ES (or Lortab, Norco)
- Prescription-only NSAIDS (e.g., Voltaren, Celebrex, Mobic, Relafen)
- Muscle Relaxants (e.g., Flexeril, Zanaflex, Lioresal, Soma)
- Morphine (e.g., Kadian, MS Contin, MorphaBond, Roxanol)
- Oxycodone (e.g., OxyContin, Percocet)
- CBT (Cognitive Behavioral Therapy)
- Medical Marijuana
- Other
- Do not know/Not sure
- I have not taken medications for low back pain

14. How often did you take these prescribed medications? **Note: If you used multiple medications for low back pain, please estimate the average frequency of use.**

- Every day
- 5-6 days per week
- 3-4 days per week
- 2 days per week
- 1 day per week
- Less often
- Do not know/Not sure
- Not Applicable

**Beliefs & Behaviors about Taking Prescription Medication**

The next set of questions ask about your beliefs and behaviors about taking prescription medication for low back pain. Please select the best response.

15. Seeing a chiropractor as a patient for low back pain changed my beliefs about taking pain medication.

|                                            |                                   |                                    |                                |                                         |
|--------------------------------------------|-----------------------------------|------------------------------------|--------------------------------|-----------------------------------------|
| Strongly disagree<br><input type="radio"/> | Disagree<br><input type="radio"/> | Undecided<br><input type="radio"/> | Agree<br><input type="radio"/> | Strongly agree<br><input type="radio"/> |
|--------------------------------------------|-----------------------------------|------------------------------------|--------------------------------|-----------------------------------------|

16. Seeing a chiropractor as a patient for low back pain changed my behaviors in taking pain medication.

|                                            |                                   |                                    |                                |                                         |
|--------------------------------------------|-----------------------------------|------------------------------------|--------------------------------|-----------------------------------------|
| Strongly disagree<br><input type="radio"/> | Disagree<br><input type="radio"/> | Undecided<br><input type="radio"/> | Agree<br><input type="radio"/> | Strongly agree<br><input type="radio"/> |
|--------------------------------------------|-----------------------------------|------------------------------------|--------------------------------|-----------------------------------------|

The next set of questions ask about your beliefs regarding treatment(s) for low back pain. Please answer as best as possible.

**Your Beliefs about Treatments for Low Back Pain:**

Please check the circle under the statement that most closely represents your belief.

1. Seeing a chiropractor for back pain makes a lot of sense.

|                       |                       |                       |                       |                       |
|-----------------------|-----------------------|-----------------------|-----------------------|-----------------------|
| Strongly disagree     | Disagree              | Undecided             | Agree                 | Strongly agree        |
| <input type="radio"/> |

2. Taking/having prescription drugs for back pain makes a lot of sense

|                       |                       |                       |                       |                       |
|-----------------------|-----------------------|-----------------------|-----------------------|-----------------------|
| Strongly disagree     | Disagree              | Undecided             | Agree                 | Strongly agree        |
| <input type="radio"/> |

3. I think seeing a chiropractor for back pain is pretty useless

|                       |                       |                       |                       |                       |
|-----------------------|-----------------------|-----------------------|-----------------------|-----------------------|
| Strongly disagree     | Disagree              | Undecided             | Agree                 | Strongly agree        |
| <input type="radio"/> |

4. I think taking prescriptions drugs are pretty useless for people with back pain

|                       |                       |                       |                       |                       |
|-----------------------|-----------------------|-----------------------|-----------------------|-----------------------|
| Strongly disagree     | Disagree              | Undecided             | Agree                 | Strongly agree        |
| <input type="radio"/> |

5. I have concerns about seeing a chiropractor for my back pain

|                       |                       |                       |                       |                       |
|-----------------------|-----------------------|-----------------------|-----------------------|-----------------------|
| Strongly disagree     | Disagree              | Undecided             | Agree                 | Strongly agree        |
| <input type="radio"/> |

6. I have concerns about taking/having prescription drugs for my back pain

|                       |                       |                       |                       |                       |
|-----------------------|-----------------------|-----------------------|-----------------------|-----------------------|
| Strongly disagree     | Disagree              | Undecided             | Agree                 | Strongly agree        |
| <input type="radio"/> |

7. I am confident chiropractic care would be a suitable treatment for my back pain

|                       |                       |                       |                       |                       |
|-----------------------|-----------------------|-----------------------|-----------------------|-----------------------|
| Strongly disagree     | Disagree              | Undecided             | Agree                 | Strongly agree        |
| <input type="radio"/> |

8. I am confident prescription drugs would be a suitable treatment for my back pain

|                       |                       |                       |                       |                       |
|-----------------------|-----------------------|-----------------------|-----------------------|-----------------------|
| Strongly disagree     | Disagree              | Undecided             | Agree                 | Strongly agree        |
| <input type="radio"/> |

Have you ever had an office visit with Chiropractic Physician [REDACTED] or will you be seeing him today?

- Yes
- No
